# Supplementary material for: Synthesis, structure, and coordination chemistry of a neutral pyrrolyl-functionalized amidinate ligand
Source: Royal Society of Chemistry journal article supplement (doi:10.1039/d1nj05548h), 2021-12-20
Supplement: d1nj05548h1.pdf [file d1nj05548h1.pdf]

Supplementary Information for:

# Synthesis, structures, and coordination chemistry of a neutral pyrrolyl functionalized amidinate ligand

Liping Guo,<sup>\*a</sup> Changjia Guo,<sup>a</sup> Shuqi Peng,<sup>a</sup> and Renyuan Song<sup>a</sup>

<sup>a</sup> Anhui Provincial Engineering Laboratory of Silicon-Based Materials, Bengbu  
University, Bengbu, Anhui 233030, China.

# Contents

Table S1. Crystallographic data for complexes **HL**, **1**, **2**, **3**, **4**

Table S2. Crystallographic data for complexes **5**, **6**, **7**, **8**

Figure S1. Molecular structure of complex **3**

Figure S2. Molecular structure of complex **4**

Figure S3. Molecular structure of complex **5**

Figure S4. Molecular structure of complex **6**

Figure S5. Molecular structure of complex **7**

Figure S6. Molecular structure of complex **8**

Figure S7.  $^1\text{H}$  NMR spectroscopy of **HL** in  $\text{C}_6\text{D}_6$

Figure S8.  $^{13}\text{C}$  NMR spectroscopy of **HL** in  $\text{C}_6\text{D}_6$

Figure S9.  $^1\text{H}$  NMR spectroscopy of complex **1** in  $\text{C}_6\text{D}_6$

Figure S10.  $^{13}\text{C}$  NMR spectroscopy of complex **1** in  $\text{C}_6\text{D}_6$

Figure S11.  $^1\text{H}$  NMR spectroscopy of complex **2** in  $\text{C}_6\text{D}_6$

Figure S12.  $^{13}\text{C}$  NMR spectroscopy of complex **2** in  $\text{C}_6\text{D}_6$

Figure S13.  $^1\text{H}$  NMR spectroscopy of complex **3** in *d*8-Tol

Figure S14.  $^{13}\text{C}$  NMR spectroscopy of complex **3** in *d*8-Tol

Figure S15.  $^1\text{H}$  NMR spectroscopy of complex **6** in  $\text{C}_6\text{D}_6$

Figure S16.  $^{13}\text{C}$  NMR spectroscopy of complex **6** in  $\text{C}_6\text{D}_6$

**Table S1** Crystallographic data for complexes **HL**, **1**, **2**, **3**, **4**

|                                                     | <b>HL</b>                                      | <b>1</b>                                                        | <b>2</b>                                                                      | <b>3</b>                                                                        | <b>4</b>                                                                         |
|-----------------------------------------------------|------------------------------------------------|-----------------------------------------------------------------|-------------------------------------------------------------------------------|---------------------------------------------------------------------------------|----------------------------------------------------------------------------------|
| Formula                                             | C <sub>31</sub> H <sub>35</sub> N <sub>3</sub> | C <sub>39</sub> H <sub>50</sub> N <sub>3</sub> NaO <sub>2</sub> | C <sub>78</sub> H <sub>100</sub> K <sub>2</sub> N <sub>6</sub> O <sub>4</sub> | C <sub>43</sub> H <sub>58</sub> Cl <sub>2</sub> N <sub>3</sub> O <sub>3</sub> Y | C <sub>43</sub> H <sub>58</sub> Cl <sub>2</sub> N <sub>3</sub> O <sub>3</sub> Er |
| FW                                                  | 449.62                                         | 615.81                                                          | 1263.83                                                                       | 824.73                                                                          | 903.08                                                                           |
| Space group                                         | P-1                                            | P 1 2 <sub>1</sub> /n 1                                         | P1 2 <sub>1</sub> /c 1                                                        | P-1                                                                             | P-1                                                                              |
| T ( K )                                             | 298.15 K                                       | 298.15 K                                                        | 298.15 K                                                                      | 298.15 K                                                                        | 298.15 K                                                                         |
| Crystal system                                      | Triclinic                                      | Monoclinic                                                      | Monoclinic                                                                    | triclinic                                                                       | triclinic                                                                        |
| a (Å)                                               | 9.2544(10)                                     | 12.6032(13)                                                     | 32.8979(17)                                                                   | 11.362(2)                                                                       | 11.3647(11)                                                                      |
| b (Å)                                               | 9.5728(11)                                     | 15.0919(15)                                                     | 11.7923(7)                                                                    | 13.161(3)                                                                       | 13.1600(12)                                                                      |
| c (Å)                                               | 15.8225(17)                                    | 20.395(2)                                                       | 19.9051(12)                                                                   | 17.005(3)                                                                       | 17.0082(16)                                                                      |
| α (deg)                                             | 99.7440(10)                                    | 90                                                              | 90                                                                            | 93.03(3)                                                                        | 93.1440(10)                                                                      |
| β (deg)                                             | 97.5900(10)                                    | 106.488(5)                                                      | 105.143(2)                                                                    | 95.98(3)                                                                        | 95.9930(10)                                                                      |
| γ(deg)                                              | 96.8580(10)                                    | 90                                                              | 90                                                                            | 110.98(3)                                                                       | 110.9720(10)                                                                     |
| Z                                                   | 2                                              | 4                                                               | 4                                                                             | 2                                                                               | 2                                                                                |
| V (Å <sup>3</sup> )                                 | 1354.9(3)                                      | 3719.8(7)                                                       | 7453.9(7)                                                                     | 2350.2(9)                                                                       | 2350.6(4)                                                                        |
| D <sub>c</sub> (Mgm <sup>-3</sup> )                 | 1.102                                          | 1.100                                                           | 1.126                                                                         | 1.165                                                                           | 1.276                                                                            |
| μ (mm <sup>-1</sup> )                               | 0.065                                          | 0.077                                                           | 0.177                                                                         | 1.391                                                                           | 1.935                                                                            |
| F (000)                                             | 484                                            | 1328                                                            | 2720                                                                          | 868.0                                                                           | 926                                                                              |
| Reflns collected                                    | 9858                                           | 166380                                                          | 336625                                                                        | 90050                                                                           | 27628                                                                            |
| Unique reflns                                       | 4721                                           | 8597                                                            | 17072                                                                         | 10522                                                                           | 10669                                                                            |
| Parameters                                          | 313                                            | 453                                                             | 823                                                                           | 512                                                                             | 475                                                                              |
| Goodness of fit                                     | 1.006                                          | 1.072                                                           | 1.025                                                                         | 1.062                                                                           | 1.025                                                                            |
| θ range (deg)                                       | 1.32-24.99                                     | 3.101-27.616                                                    | 2.933-27.563                                                                  | 2.981- 27.582                                                                   | 1.210 - 27.530                                                                   |
| R <sub>1</sub> ( I > 2σ(I) )                        | 0.0491                                         | 0.0957                                                          | 0.1074                                                                        | 0.0622                                                                          | 0.0361                                                                           |
| wR <sub>2</sub> ( I > 2σ(I) )                       | 0.1678                                         | 0.1811                                                          | 0.2898                                                                        | 0.1449                                                                          | 0.0876                                                                           |
| R(int)                                              | 0.0214                                         | 0.1431                                                          | 0.1147                                                                        | 0.0487                                                                          | 0.0425                                                                           |
| Largest diff.peak<br>and hole (e. Å <sup>-3</sup> ) | 0.305<br>-0.190                                | 0.290<br>-0.797                                                 | 1.021<br>-0.797                                                               | 0.43<br>-0.59                                                                   | 0.977<br>-1.118                                                                  |

**Table S2** Crystallographic data for complexes **5**, **6**, **7**, **8**

|                                                     | <b>5</b>                                                                         | <b>6</b>                                                         | <b>7</b>                                                         | <b>8</b>                                                          |
|-----------------------------------------------------|----------------------------------------------------------------------------------|------------------------------------------------------------------|------------------------------------------------------------------|-------------------------------------------------------------------|
| Formula                                             | C <sub>43</sub> H <sub>58</sub> Cl <sub>2</sub> N <sub>3</sub> O <sub>3</sub> Yb | C <sub>39</sub> H <sub>56</sub> N <sub>3</sub> Si <sub>2</sub> Y | C <sub>39</sub> H <sub>56</sub> ErN <sub>3</sub> Si <sub>2</sub> | C <sub>39</sub> H <sub>56</sub> N <sub>3</sub> Si <sub>2</sub> Yb |
| FW                                                  | 908.86                                                                           | 711.95                                                           | 790.30                                                           | 796.09                                                            |
| Space group                                         | P-1                                                                              | C 1 2/c 1                                                        | P-1                                                              | P-1                                                               |
| T ( K )                                             | 298.15 K                                                                         | 298.15 K                                                         | 298.15 K                                                         | 298.15 K                                                          |
| Crystal system                                      | triclinic                                                                        | Monoclinic                                                       | triclinic                                                        | Triclinic                                                         |
| a (Å)                                               | 11.400(10)                                                                       | 13.872(2)                                                        | 11.4267(8)                                                       | 11.4008(10)                                                       |
| b (Å)                                               | 13.189(12)                                                                       | 17.623(2)                                                        | 18.5276(13)                                                      | 18.4999(16)                                                       |
| c (Å)                                               | 17.09(5)                                                                         | 36.834(6)                                                        | 20.0773(14)                                                      | 20.1152(18)                                                       |
| α (deg)                                             | 93.34(9)                                                                         | 90                                                               | 93.5150(10)                                                      | 93.4610(10)                                                       |
| β (deg)                                             | 95.90(4)                                                                         | 91.546(4)                                                        | 98.1530(10)                                                      | 98.1800(10)                                                       |
| γ(deg)                                              | 111.100                                                                          | 90                                                               | 98.1800                                                          | 97.8690(10)                                                       |
| Z                                                   | 2                                                                                | 8                                                                | 4                                                                | 8                                                                 |
| V (Å <sup>3</sup> )                                 | 2372(8)                                                                          | 9001(2)                                                          | 4150.4(5)                                                        | 4146.0(6)                                                         |
| D <sub>c</sub> (Mgm <sup>-3</sup> )                 | 1.273                                                                            | 1.051                                                            | 1.265                                                            | 1.275                                                             |
| μ (mm <sup>-1</sup> )                               | 2.120                                                                            | 1.374                                                            | 2.107                                                            | 2.341                                                             |
| F (000)                                             | 930                                                                              | 3024                                                             | 1628                                                             | 1636                                                              |
| Reflns collected                                    | 27749                                                                            | 115728                                                           | 47688                                                            | 47293                                                             |
| Unique reflns                                       | 10704                                                                            | 7921                                                             | 18624                                                            | 18538                                                             |
| Parameters                                          | 475                                                                              | 371                                                              | 835                                                              | 896                                                               |
| Goodness of fit                                     | 1.033                                                                            | 1.068                                                            | 1.016                                                            | 1.021                                                             |
| θ range (deg)                                       | 1.204-27.549                                                                     | 2.151-24.999                                                     | 1.028-27.573                                                     | 1.03-27.51                                                        |
| R <sub>1</sub> ( I > 2σ( I ) )                      | 0.0356                                                                           | 0.1076                                                           | 0.0314                                                           | 0.0266                                                            |
| wR <sub>2</sub> ( I > 2σ( I ) )                     | 0.0860                                                                           | 0.3165                                                           | 0.0787                                                           | 0.0611                                                            |
| R(int)                                              | 0.0395                                                                           | 0.1048                                                           | 0.0224                                                           | 0.0258                                                            |
| Largest diff.peak<br>and hole (e. Å <sup>-3</sup> ) | 0.787<br>-1.299                                                                  | 0.955<br>-0.641                                                  | 0.930<br>-1.552                                                  | 1.136<br>-1.317                                                   |



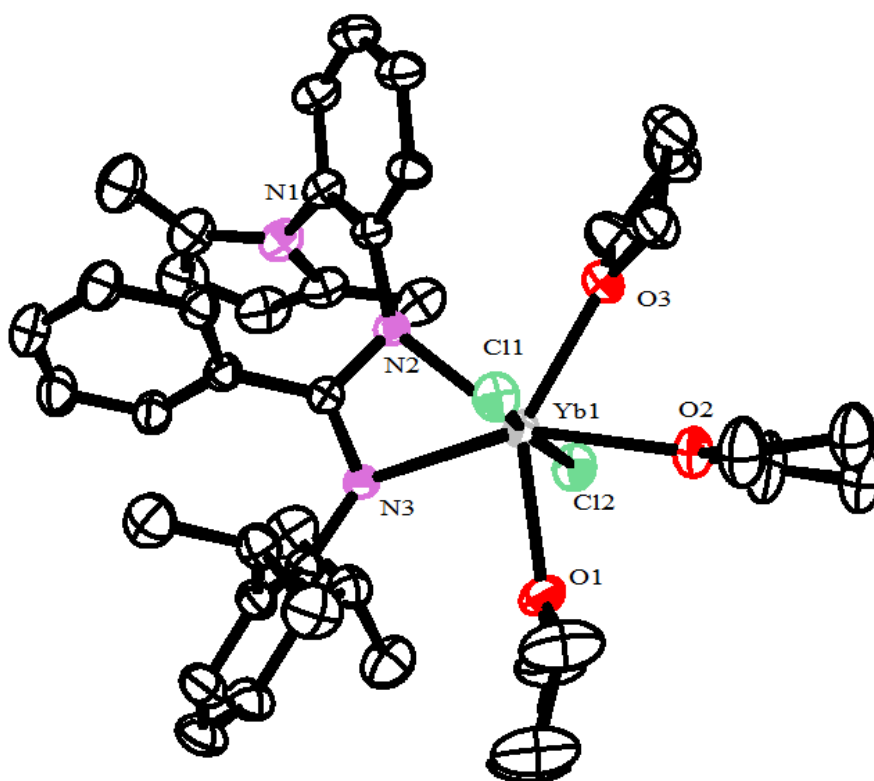

Figure S3. Molecular structure of complex 5

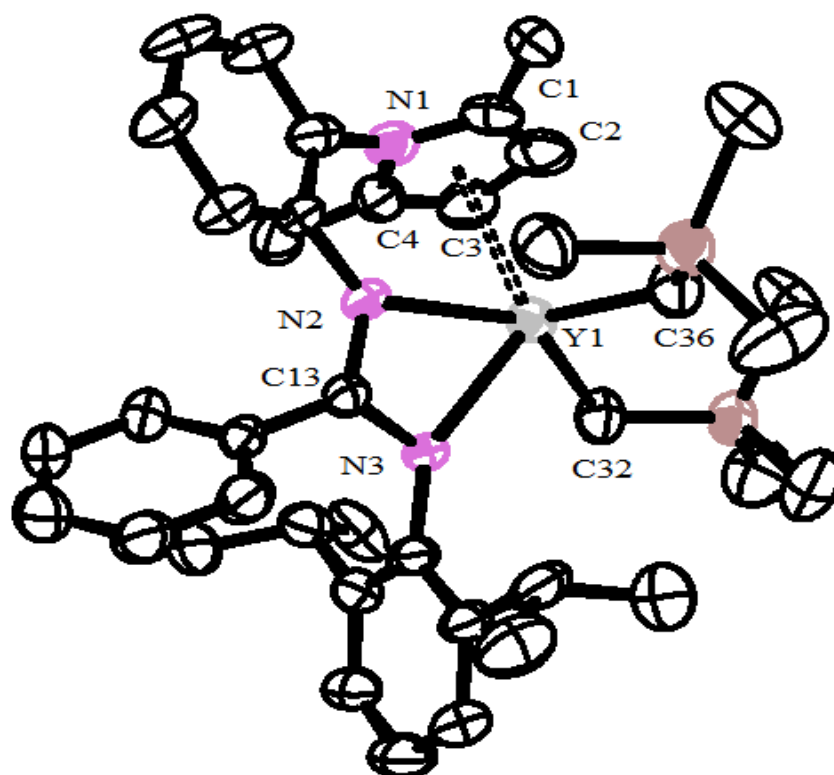

Figure S4. Molecular structure of complex 6



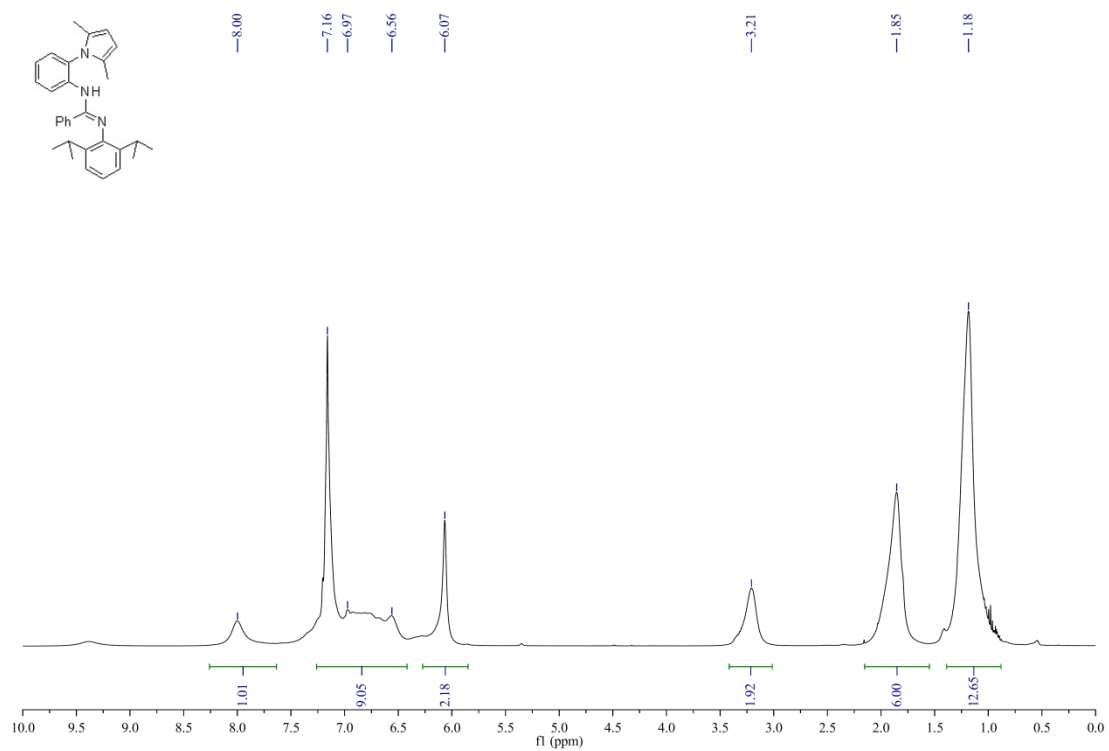

Figure S7. <sup>1</sup>H NMR spectroscopy of **HL** in C<sub>6</sub>D<sub>6</sub>

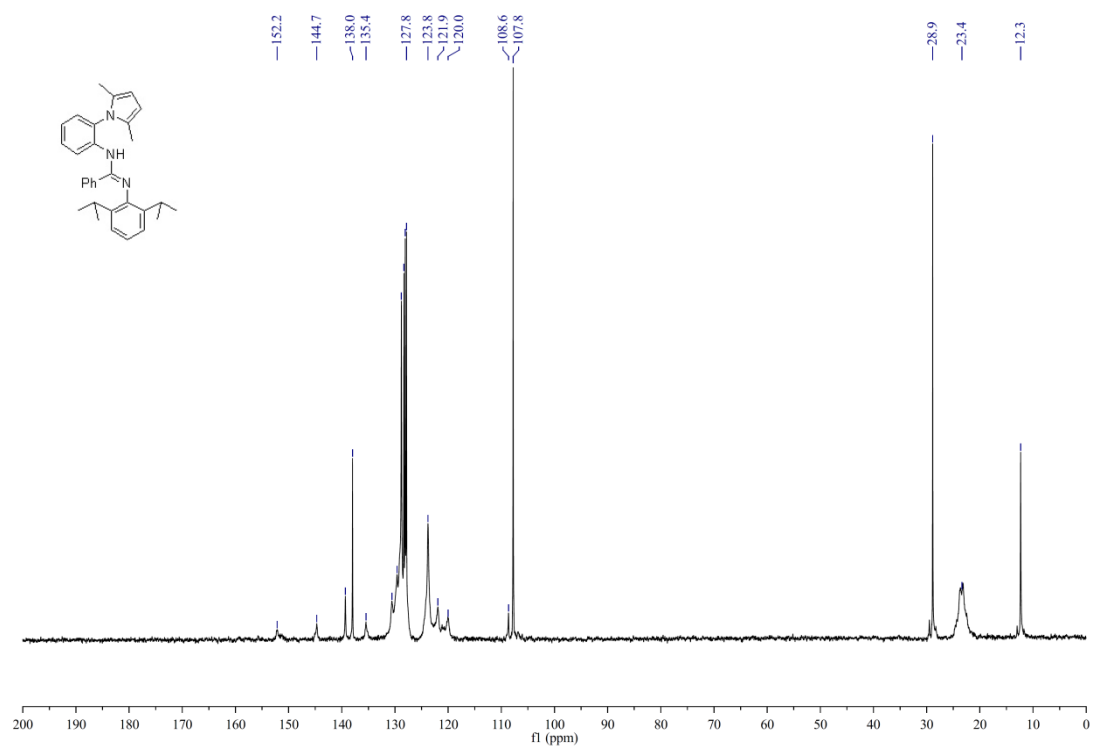

Figure S8. <sup>13</sup>C NMR spectroscopy of **HL** in C<sub>6</sub>D<sub>6</sub>



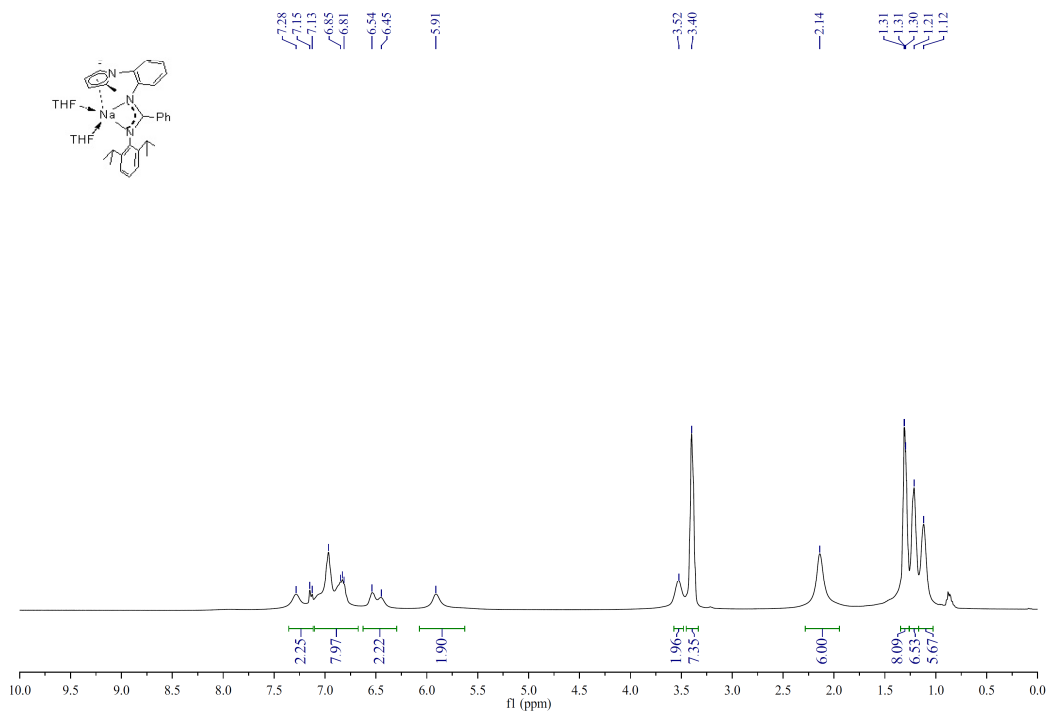

Figure S9. <sup>1</sup>H NMR spectroscopy of complex 1 in C<sub>6</sub>D<sub>6</sub>

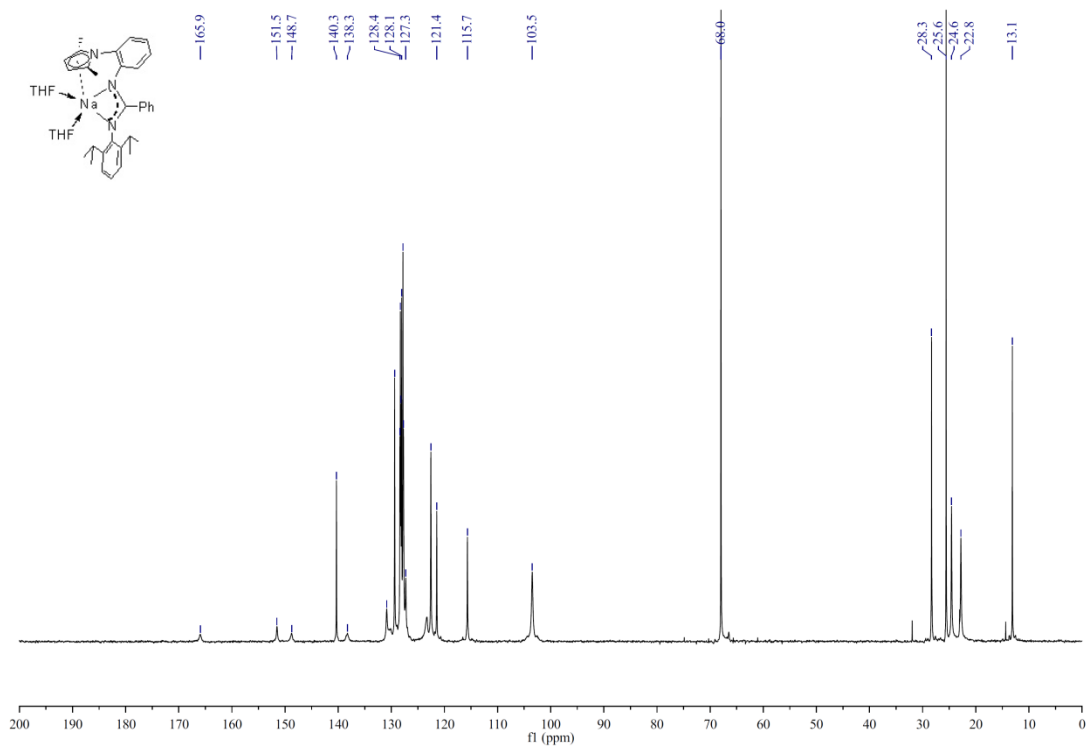

Figure S10. <sup>13</sup>C NMR spectroscopy of complex 1 in C<sub>6</sub>D<sub>6</sub>

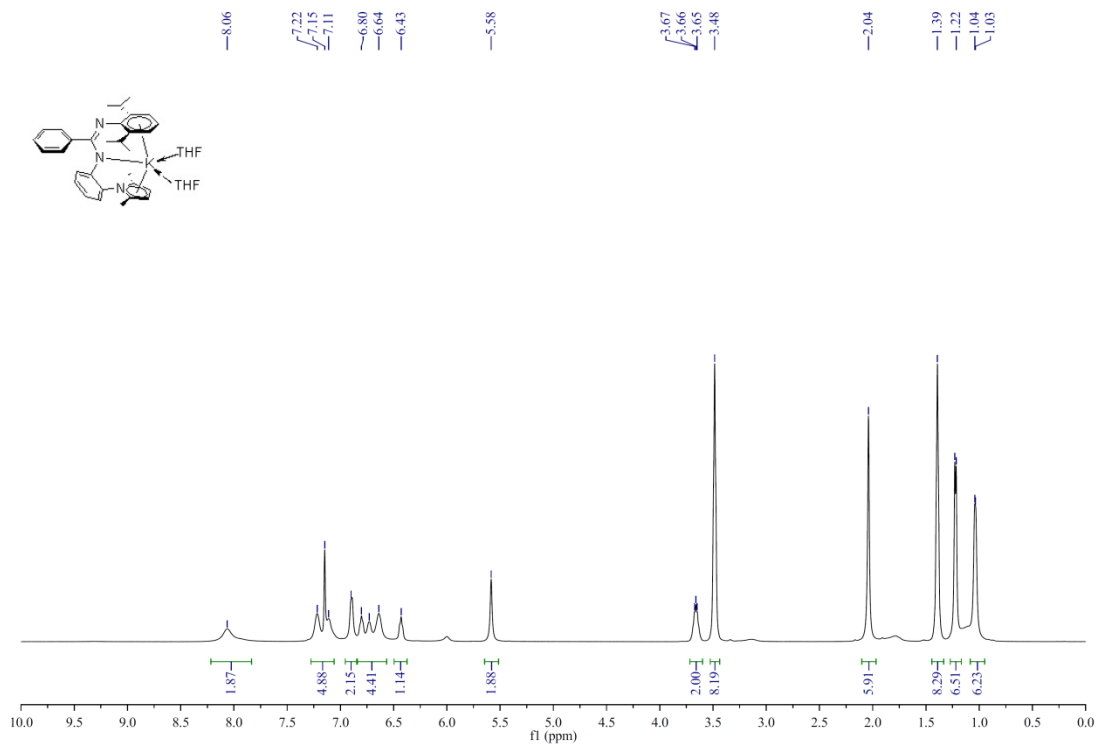

Figure S11.  $^1\text{H}$  NMR spectroscopy of complex **2** in  $\text{C}_6\text{D}_6$

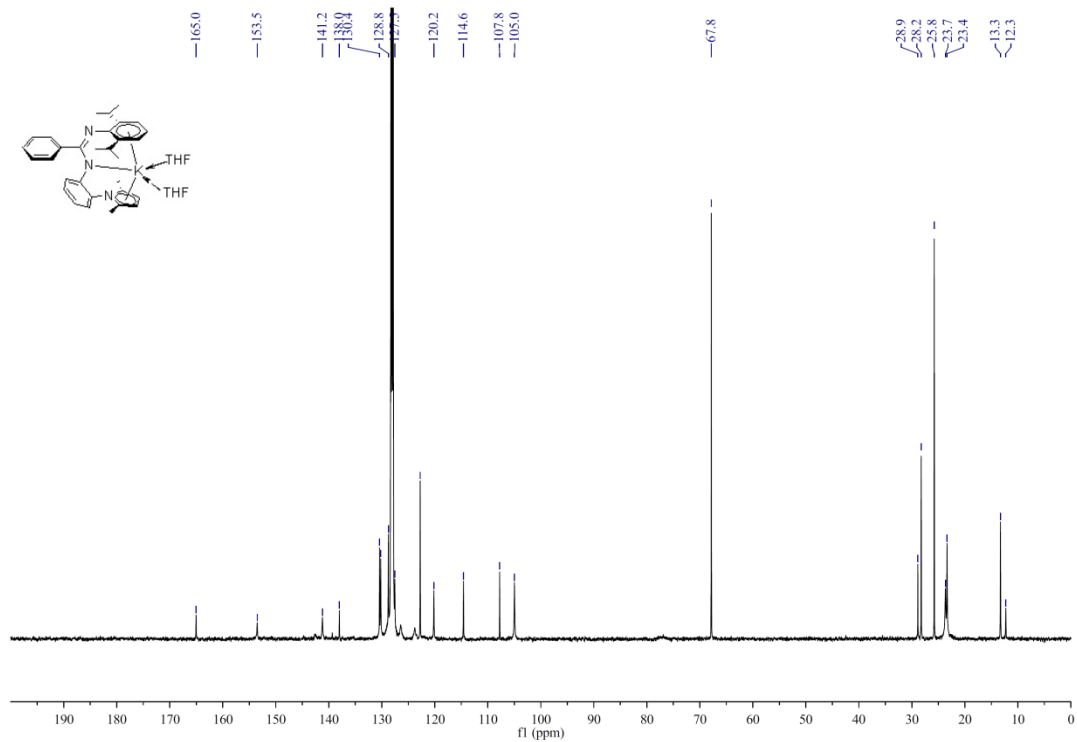

Figure S12.  $^{13}\text{C}$  NMR spectroscopy of complex **2** in  $\text{C}_6\text{D}_6$

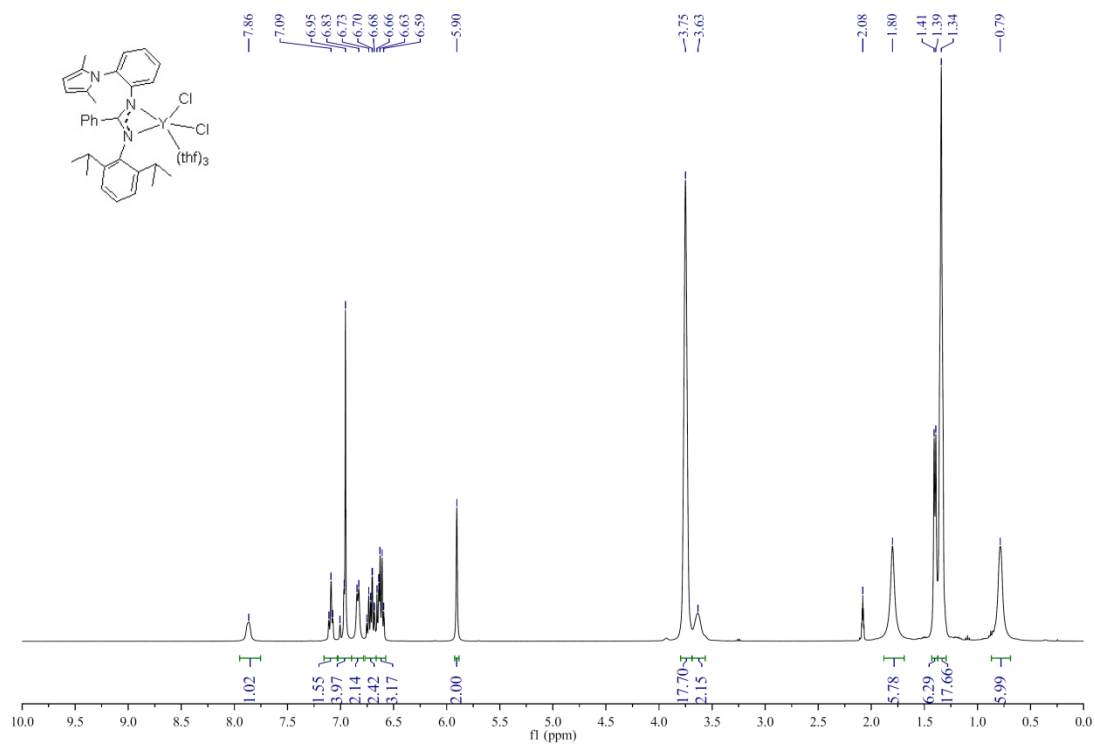

Figure S13.  $^1\text{H}$  NMR spectroscopy of complex **3** in *d*8-tol

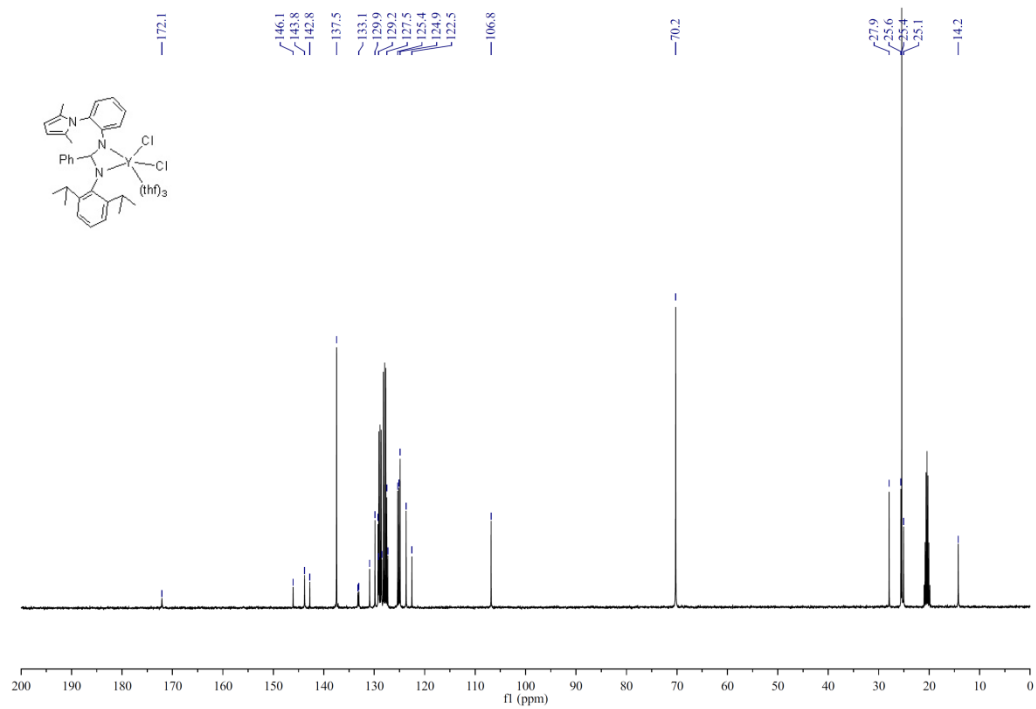

Figure S14.  $^{13}\text{C}$  NMR spectroscopy of complex **3** in *d*8-tol

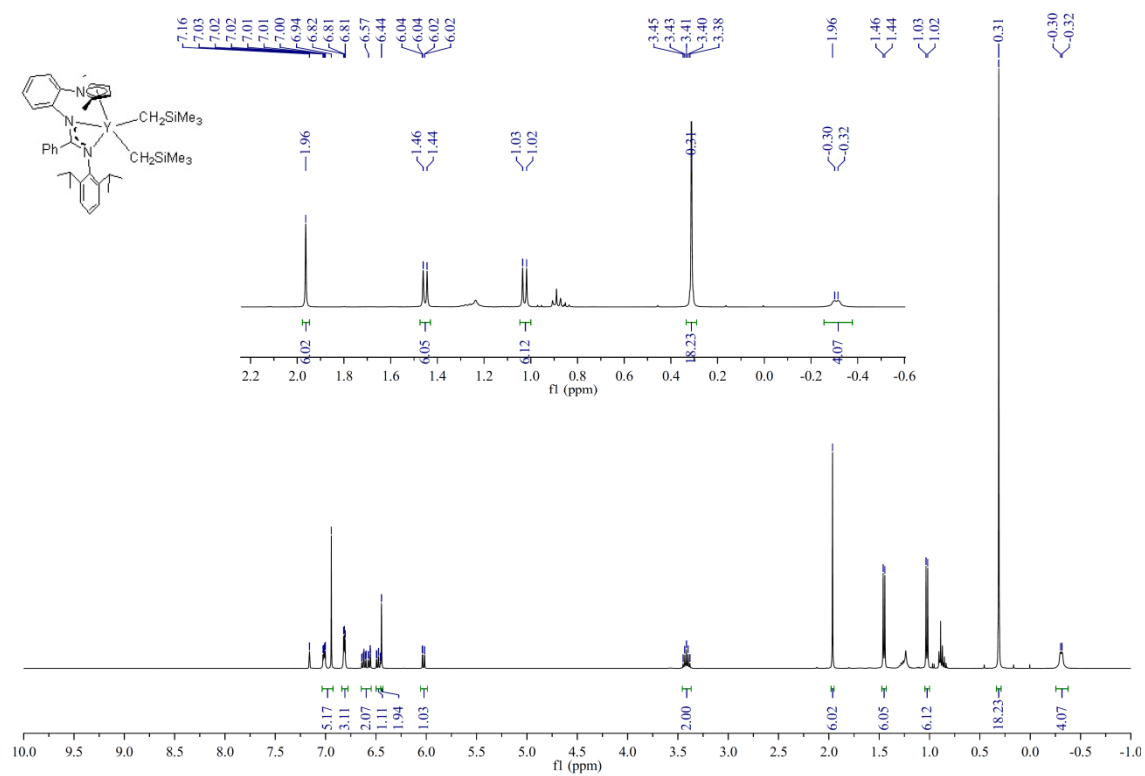

Figure S15.  $^1\text{H}$  NMR spectroscopy of complex **6** in  $\text{C}_6\text{D}_6$

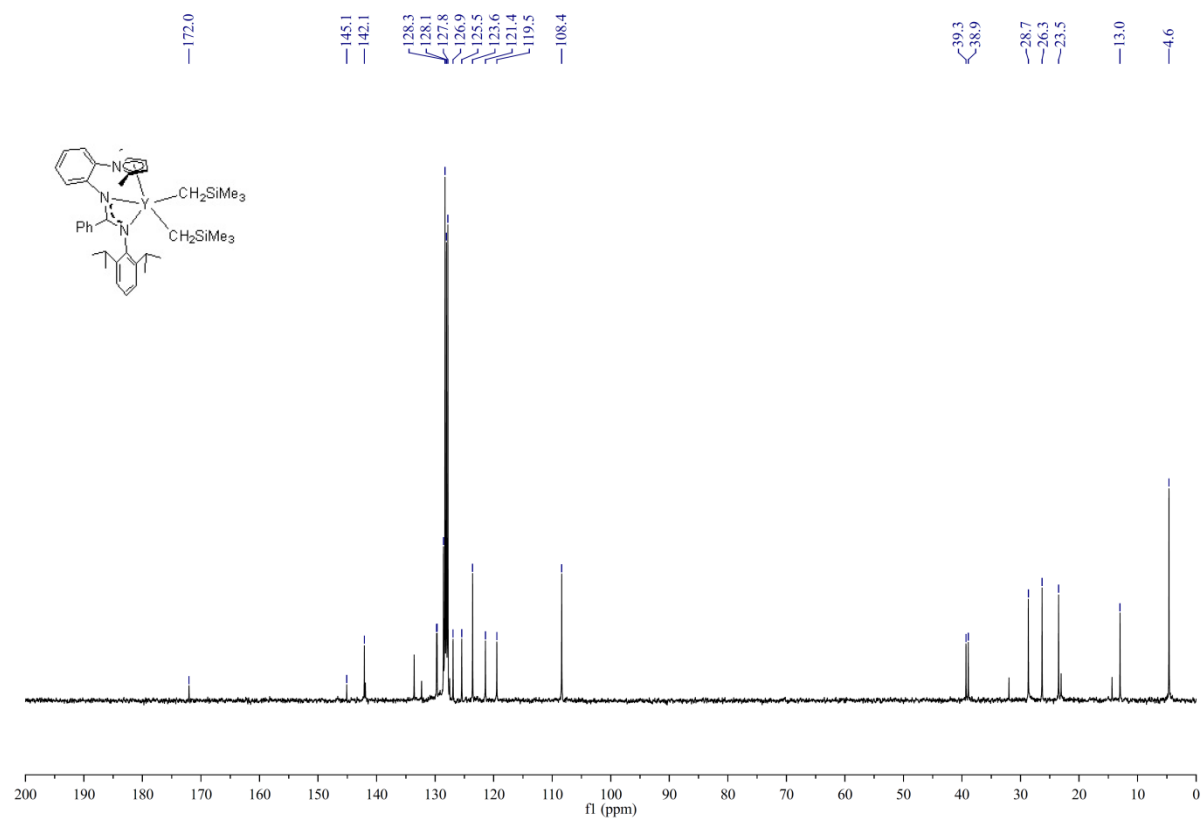

Figure S16.  $^{13}\text{C}$  NMR spectroscopy of complex **6** in  $\text{C}_6\text{D}_6$
